# Supplementary material for: Peste des Petits Ruminants at the Wildlife–Livestock Interface in the Northern Albertine Rift and Nile Basin, East Africa
Source: PubMed Central journal article supplement (PMC7150925; doi:10.3390/v12030293), 2020-03-07
Supplement: viruses-12-00293-s001.pdf [file viruses-12-00293-s001.pdf]

## **Supplementary Material - Peste des Petits Ruminants at the Wildlife-Livestock Interface in the Northern Albertine Rift and Nile Basin, East Africa**

### **History of PPR in East Africa**

The first PPR cases described in livestock from East Africa date from 1971-1972 in Sudan [1], followed by outbreaks in Ethiopia, suspected since 1977 and confirmed in 1989-1990 [2]. Serology also indicated the exposure of sheep and goats to PPRV from the Karamoja region of northeastern Uganda in 1985 and in northern and western regions of Kenya in 1987-1991 [3], suggesting that PPRV may have had occasional incursion into other East African countries. An endemic situation with almost yearly incidence of PPR livestock outbreaks was already established by 2000 in Sudan and Ethiopia [4,5], but based on serology of wild animal populations, the virus apparently did not persist further south in East Africa (Table S2) [6]. This apparent barrier may well reflect the continued circulation of RPV in East Africa up until 2002 and vaccination beyond until its final elimination reported in 2011 [7]. Rinderpest is a close relative to PPR, serologically indistinguishable by some ELISAs and for which infection is cross protective.

The first PPR cases described this century in Uganda were in Soroti district in 2003, without much epidemiological information [8]. This corresponds with previous reports of PPR cases in areas from South Sudan (former Sudan) near to the Ugandan border in 2002 and suspected PPR and antibody detection in livestock from Tanzania 2004 (Table S1) [9]. In 2006-2008, the first official and large PPR outbreak was reported in Kenya and was also associated with disease in the bordering Uganda region of Karamoja in 2007-2008 and northern Tanzania in 2008 [4,9,10]. Uganda reported more than 180,000 disease cases and about 7,200 losses in that outbreak, numbers that are likely underestimated [11,12]. Further outbreaks in Uganda occurred in northern districts of Lamwo and Abim in 2010 with about 3,800 losses [13] and other locations throughout 2011-2016 but with limited epidemiological information [14-18]. PPR appeared to be absent in Ugandan wildlife prior to 2004 from serosurveillance under the PARC/PACE programs for RP eradication, but African buffalo (*Syncerus caffer*) turned seropositive in analyses of convenience samples from 2004-2005 in Kidepo (8% prevalence), Murchison Falls National Park (MFNP, 24% prevalence) and Queen Elizabeth National Park (QENP, 25% prevalence), corresponding with the first reports of PPR in livestock (Table S1, Table S2). All the evidence suggests that PPR was probably present in some parts of the country and causing outbreaks of disease when introduced to naïve areas since about 2004. This scenario was supported by serosurveys in 2009, 2011 and 2016 that provided a heterogeneous image with PPRV antibodies in small livestock from most of the northern and eastern Uganda districts, and a wider spread

of the virus than previously assumed throughout the country [13,18,19]. A similar widespread but spatially discrete pattern of PPRV antibodies is described in national surveys of Ethiopia [20] and Tanzania [21]. The consistent detection of PPRV or PPRV-antibodies in some nomadic and semi-nomadic pastoralist systems from South Sudan, north-eastern Uganda, north-western Kenya and northern Tanzania suggests that the virus may persist locally or by encompassing larger transboundary areas (Table S1) [21–24].

## **Characteristics of natural and livestock systems in study areas from Uganda, South Sudan and Democratic Republic of the Congo**

### *Western Uganda*

Queen Elizabeth Conservation Area and Murchison Falls Conservation Area include their respective national parks and are the largest savanna ecosystems in western Uganda with an area of 2,401 km<sup>2</sup> and 5,045 km<sup>2</sup> respectively [25]. Mgahinga National Park (MGNP) is a small volcano area of 33.7 km<sup>2</sup> with high tropical forest located in the southwest corner of Uganda, bordering with Rwanda and DRC (Figure 1).

Buffalo and Uganda kob (*Kobus kob thomasi*) are the predominant wild ungulates in open landscapes from western Uganda and neighboring regions, with an estimated population of 10,721 buffalo and 15,469 Uganda kob in the Queen Elizabeth National Park (QENP) in 2016 [26]. These two gregarious species have local movement patterns within QENP [27], but limited migrations may occur to the Virunga National Park in DRC through the north and south sections of Lake Edward [28]. The ecological barriers of Kazinga channel and Maramagambo forest in QENP apparently restrict wild ungulate movements and contacts from the northern and southern savanna sectors [29] (Figure 2). Other common artiodactyls in QENP are hippopotamus (*Hippopotamus amphibius*), waterbuck (*Kobus ellipsiprymnus*), warthog (*Phacochoerus africanus*) and topi (*Damaliscus lunatus*). Presence of potentially susceptible forest species such as bushbuck (*Tragelaphus scriptus*), duikers (*Cephalophus* spp.) or forest hog (*Hylochoerus meinertzhageni*) is notable and potentially might provide bridge hosts across the forest ecosystems.

Human population in sub-counties around QENP (Kihiihi, Bwambara, Kyamuhunga, Rutoto, Ryeru, Kicwamba, Kirugu, Katunguru, Katerera, Kyabakara, Muhokya, Karusandara, Nyamwamba, Kasese, Kanara, Nyakatonzi, Katwe-Kabatoro, Lake Katwe, Nyakyumbu and Isango ) was estimated at 440,862 in 2014, mostly located in the counties adjacent to the northern and western border of the park [30]. The livestock system of western Uganda is markedly different to the pastoral systems of South Sudan, eastern Uganda and Kenya where PPR is more usually associated. Activities typically involve agriculture

and livestock, which is predominantly structured on small household herds for subsistence production [31]. Livestock presence by household around QENP are mainly goats in 64% of the households, followed by cattle in 13% and sheep in 11% [25].

The Basongora are traditional cattle pastoralists that settled in 2006-2007 around the northern border of QENP in Kasese district [32]. A total of 11 fishing villages around Lake George and Edwards also occur in small enclaves within the boundaries of QENP and with a varied range of livestock that numbers only a few hundred or thousands. Other communities around QENP are mainly Bakonzo farmers with fewer small livestock around households. Ankole cattle herds from Basongora may be up to 300 animals and perform daily movements around communal pastures bordering the northern part of QENP and inter-mix at water holes and communal grazing areas [32]. In contrast, sheep and goats free-range around human settlements and do not perform large displacements although undoubtedly small numbers of animals are traded and move in and out of the area frequently. The number of livestock is increasing and thus the grazing pressure around the park, leading some farmers to illegally drive their herds inside QENP looking for better pastures [28]. Large mammals in QENP are also following an increasing population trend in the last decades and as a result, a range of indirect interactions with wildlife occur on the border of QENP and its buffer zones [32].

The latest national livestock census in 2008 provided information at district level and estimated  $43326 \pm 4533.9$  goats,  $3884 \pm 866.3$  sheep and  $34801 \pm 7898.5$  cattle in Buliisa district,  $227,518 \pm 17937.7$  goats,  $24890 \pm 4097.8$  sheep and  $97243 \pm 41548.7$  cattle in Kasese district,  $376561 \pm 25427.8$  goats,  $79757 \pm 5966.8$  sheep and  $207184 \pm 9398.6$  cattle in the former Bushenyi district that included the actual Rubirizi district, and  $96815 \pm 6595.8$  goats,  $39554 \pm 4295.9$  sheep and  $28083 \pm 3115.3$  cattle in Kisoro district [31].

#### *South Sudan - Nile Basin*

One of Africa's largest remaining wilderness areas is situated in South Sudan. Boma National Park covers 20,000 Km<sup>2</sup> and is dominated by a plateau covered by woodlands and wooded savanna but also presents grassland plains and swamps; the Sudd wetland is an extensive floodplain that is fed by the White Nile and hosts three protected areas in the north/north west; the Southern National Park is covered by homogeneous woods [33]. The eastern area of the country, encompassing the Sudd and from Bandingilo NP to Boma NP, hosts some of the last major mammal migrations in the world: white-eared kob (*Kobus kob leucotis*), tiang (*Damaliscus lunatus tiang*), and Mongalla gazelle (*Eudorcas albonotata*) for an estimated total 1.2 million animals move freely within an almost uninterrupted ecosystem [33]. Other common wild

artiodactyl species are Bohor reedbuck (*Redunca redunca*), African buffalo, Nile lechwe (*Kobus megaceros*), Grant's gazelle, Lelwel hartebeest (*Alcelaphus buselaphus lelwel*), and warthog [33].

Small and sparse settlements are distributed along rivers in and around the protected areas, mainly near the northern and eastern border of the country. Principal human activities are subsistence pastoralism, fishing, hunting and agriculture; 989,889 cattle and 149,451 sheep and goats were estimated to live in and around the protected areas in 2007 [33]. During two decades of civil war (1983-2005), the military groups have largely exploited wildlife for rations, and buffaloes, zebras and hartebeest populations have been decimated in Boma NP [33]. Migratory species have survived, although tiang numbers have plummeted (Kock, M. personal communication). A 2005 peace agreement put an end to the civil war, but new fighting broke out in 2013 and are still ongoing. With a human population of 8,260,490 in 2009 [34] and a projection of 13,249,924 in 2020 [35], the achievement of a new situation of peace could paradoxically pose other threats to the conservation of biodiversity. During the 2005-2013 period of stability, human activities began to expand in previously untouched areas [33]. The predominant pastoral lifestyle is likely to expand under stability periods along with livestock populations as communities recover and occupy land currently used by wildlife, increasing risk of epizooties caused by livestock diseases.

#### *Eastern Democratic Republic of the Congo*

Virunga National Park is located in the eastern DRC, close to the border with Uganda and Rwanda (Figure 1). Thanks to its wide variety of habitats, like glaciers, forests and savannas, it is considered the most biodiverse area of the Albertine Rift Mountains [36]. Wild artiodactyl species populating the park are substantially comparable to those mentioned above for Uganda, with the latest available counts of the most abundant species reporting 4,584 Uganda Kobs, 630 Topi, and 586 Buffaloes in 2014 [26].

The park is located in the North Kivu province, an historically densely populated region with an estimated population of 6,034,208 in 2015 [37]. However, it is very difficult to estimate its actual population, since the most recent census date back to the 1990s [38]. Furthermore, since the second half of the 1990s, the context of war and political instability of the DRC and its neighbouring countries has generated a profound demographic, socioeconomic and urban reconfiguration [38]. In the eastern provinces of North and South Kivu, boomtowns have developed alongside the already established urban centres, especially around refugee and internally displaced person camps, transforming rural landscapes in new urbanised areas [38].

Large livestock was the most affected by the war: most of the cattle were looted or killed. For this reason, livestock activities shifted to raising of small farm animals (poultry, rabbits, goats, swine and guinea pigs), which can be carried more easily by the owners in case of displacement [37]. In 2014, all livestock species were increasing in North Kivu, but they had not yet reached the pre-conflict numbers: 404,390 goats, 328,670 pigs, 277,100 cattle, and 222,320 sheep were counted in the province [37].

**Figure S1.** Clinical signs observed in the outbreak of disease with a PPR-like syndrome in Kabale and Kisoro districts from western Uganda in 2017. These included depression and respiratory distress with profuse nasal catarrhal exudate and excessive salivation that crusted over the lips and nostrils (A and B), severe diarrhea (C) and corneal opacity (D).

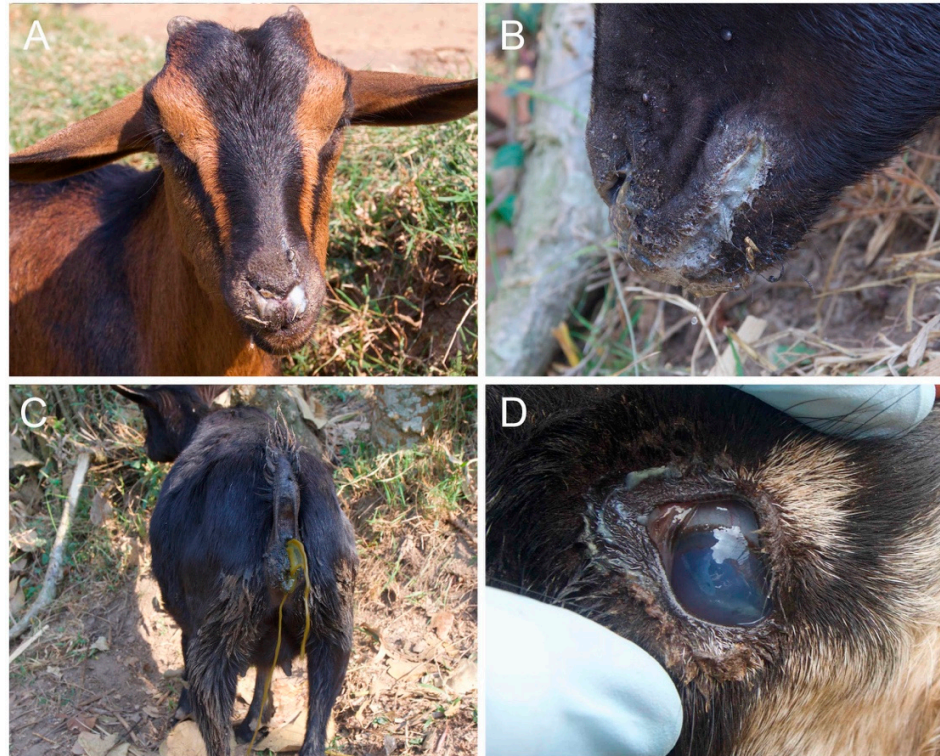

**Table S1.** Historical records on Peste des petits Ruminants outbreaks and evidence of viral exposure in Uganda, South Sudan and Democratic Republic of the Congo. Numbers on cases and areas affected are as reported or stated in the references but may be unprecise or underestimated. Administrative divisions are indicated as reported and may correspond to former political borders. S: susceptible, C: cases, D: deaths, S/D: slaughtered or destroyed, NA: unknown, VNT: Virus neutralization test; PACE: Pan African Programme for the Control of Epizootics; NADDEC: National Animal Disease Diagnostics and Epidemiology Centre Laboratories (Uganda).

| UGANDA                                                                                                          |                 |            |             |    |        |      |      |                   |         |                         |
|-----------------------------------------------------------------------------------------------------------------|-----------------|------------|-------------|----|--------|------|------|-------------------|---------|-------------------------|
| State or region, district or province, (city)                                                                   | Species         | Date       | Outbreaks*  | S  | C      | D    | S/D  | Lab. confirmation | Lineage | Reference               |
| Eastern Region, Karamoja sub-Region                                                                             | Sheep, goats    | 1985       | Sero-survey | NA | NA     | NA   | NA   | VNT               | NA      | [3]                     |
| Eastern Region, Soroti District                                                                                 | Sheep           | 2003       | 1           | NA | NA     | NA   | NA   | NA                | NA      | [8]                     |
| Northern and Western Region                                                                                     | African Buffalo | 2004-2005  | Sero-survey |    |        |      |      | cELISA<br>VNT     |         | PACE program / Table S1 |
| Northern Region, Karamoja sub-region, Kotido and Kaabong Districts                                              | NA              | 2006       | NA          | NA | NA     | NA   | NA   | NA                | NA      | [39,40]                 |
| Northern Region, Karamoja sub-Region, Moroto District                                                           | Sheep, goats    | 03/04/2007 | 5           | NA | 8291   | 2401 | 4175 | cELISA<br>RT-PCR  | 3       | [40,41]                 |
| Northern Region, Karamoja sub-Region, Nakapiripirit, Moroto, Kotido, Kaabong and Abim Districts                 | Sheep, goats    | 2007       | 1           | NA | NA     | NA   | NA   | RT-PCR            | 3,4     | [10,22]                 |
| Northern Region, Karamoja sub-Region, Nakapiripirit, Moroto, Kotido, Kaabong and Abim Districts                 | Sheep, goats    | 2008       | 1           | NA | NA     | NA   | NA   | RT-PCR            | 4       | [10,22]                 |
| NA                                                                                                              | NA              | 2008       | 2           | NA | 177000 | 617  | NA   | NA                | NA      | [12]                    |
| Northern Region, Lira, Pader, Kitgum Districts.<br>Eastern Region, Soroti, Katakwi, Kapchorwa, Amuria, Bukedea, | Sheep, goats    | 2009       | Sero-survey |    |        |      |      | cELISA            |         | [42]                    |

|                                                                                                                                                          |                             |                   |             |       |      |      |        |               |            |        |
|----------------------------------------------------------------------------------------------------------------------------------------------------------|-----------------------------|-------------------|-------------|-------|------|------|--------|---------------|------------|--------|
| Bukwa, Kaberamaido and Sironko Districts                                                                                                                 |                             |                   |             |       |      |      |        |               |            |        |
| Northern Region, Karamoja sub-Region, Moroto, Nakapiripirit, Abim and Kotido Districts                                                                   | Sheep, goats                | 2009              | Sero-survey |       |      |      |        | cELISA        | [43]       |        |
| Northern Region, Amuru and Gulu Districts                                                                                                                | Sheep, goats                | 2009              | Sero-survey |       |      |      |        | cELISA        | [19]       |        |
| Northern Region, Abim District                                                                                                                           | Sheep, goats                | 09/2010           | 1           | NA    | NA   | 3447 | NA     | NA            | NA         | NADDEC |
| Northern Region, Lamwo District                                                                                                                          | Goats                       | 05/2010 - 09/2010 | 1           | NA    | NA   | 300  | NA     | cELISA RT-PCR | NA         | NADDEC |
| Northern Region, 19 districts; Eastern Region, 10 districts; Western Region, 6 districts; Central Region, 1 district. #                                  | Sheep, goats                | Sero-survey       |             |       |      |      | cELISA | [13]          |            |        |
| NA                                                                                                                                                       | NA                          | 2011              | 4           | NA    | 1375 | 145  | 0      | NA            | NA         | [17]   |
| Central Region, Kampala District                                                                                                                         | Goats                       | 2012              |             |       |      |      |        | cELISA        | [44]       |        |
| Northern Region, Kotido District.                                                                                                                        | Goat                        | 2012              | NA          | NA    | NA   | NA   | NA     | RT-PCR        | 3          | [14]   |
| NA                                                                                                                                                       | NA                          | 2012              | 1           | NA    | NA   | NA   | NA     | RT-PCR        | 3          | [15]   |
| NA                                                                                                                                                       | NA                          | 2013              | 8           | 83142 | 559  | 90   | 0      | NA            | NA         | [16]   |
| NA                                                                                                                                                       | NA                          | 2014              | 2           | 1321  | 773  | 90   | 0      | NA            | NA         | [45]   |
| Western Region, Kasese and Rubirizi Districts                                                                                                            | Sheep, goats, cattle        | 2016              | Sero-survey |       |      |      |        | cELISA        | [18]       |        |
| Western Region, Kanungu and Kasese Districts                                                                                                             | African Buffalo, Uganda kob | 2015, 2017        | Sero-survey |       |      |      |        | cELISA        | This study |        |
| Western Region, Kasese, Rubirizi and Kisoro Districts                                                                                                    | Sheep, goats, cattle        | 2015 - 2017       | Sero-survey |       |      |      |        | cELISA        | This study |        |
| Northern Region, Karamoja sub-Region, Loro Subcounty in Amudat District; Nakapelimoru Subcounty in Kotido District; Kamion Subcounty in Kaabong District | Sheep, goats                | 2018              | NA          | NA    | NA   | NA   | NA     | cELISA RT-PCR | 3          | [22]   |
| <b>SOUTH SUDAN</b>                                                                                                                                       |                             |                   |             |       |      |      |        |               |            |        |



| State or region, district or province, (city)                                                 | Species          | Date       | Outbreaks*  | S     | C   | D  | S/D | Lab. confirmation | Lineage | Reference             |
|-----------------------------------------------------------------------------------------------|------------------|------------|-------------|-------|-----|----|-----|-------------------|---------|-----------------------|
| Jonglei State, Akobo county (Nyijule)                                                         | Sheep, goats     | 31/12/2004 | NA          | NA    | NA  | NA | NA  | No                | NA      | Veterinary Department |
| Eastern Equatoria State, Kapoeta East County (Narus)                                          | Goats            | 10/01/2005 | NA          | NA    | NA  | NA | NA  | No                | NA      | Veterinary Department |
| Jonglei State, Duk County (Poktop)                                                            | Sheep, goats     | 13/02/2005 | NA          | NA    | NA  | NA | NA  | No                | NA      | Veterinary Department |
| Eastern Equatoria State, Budi County (Lotukei)                                                | Goats            | 25/10/2005 | NA          | 500   | 127 | 20 | NA  | No                | NA      | Veterinary Department |
| Eastern Equatoria State, Kapeota East and North Counties                                      | Goats            | 14/02/2009 | NA          | 1500  | 60  | 10 | NA  | No                | NA      | Veterinary Department |
| Northern Bhar Elghazal State, Aweil West County                                               | Sheep            | 30/01/2010 | NA          | 4000  | 4   | 3  | NA  | No                | NA      | Veterinary Department |
| Warab State, Gogrial West County                                                              | Goats            | 01/06/2011 | NA          | 2500  | 5   | 1  | NA  | RT-PCR            | 4       | Veterinary Department |
| Lakes State, Cueibet county                                                                   | Sheep, goats     | 20/04/2012 | NA          | NA    | NA  | NA | NA  | No                | NA      | Veterinary Department |
| Central Equatoria State, Juab County (Kajokij)                                                | Goats            | 15/06/2012 | NA          | NA    | NA  | NA | NA  | No                | NA      | Veterinary Department |
| Warab State, Gogrial East County                                                              | Goats            | 30/06/2012 | NA          | NA    | NA  | NA | NA  | No                | NA      | Veterinary Department |
| Northern Bhar Elghazal State, Awial East County                                               | Sheep, goats     | 05/08/2012 | NA          | NA    | NA  | NA | NA  | No                | NA      | Veterinary Department |
| Jonglei State, Twic East County                                                               | Goats            | 25/08/2012 | NA          | NA    | NA  | NA | NA  | No                | NA      | Veterinary Department |
| Warab State, Gogrial West County                                                              | Goats            | 04/09/2012 | NA          | 2000  | 62  | 7  | NA  | No                | NA      | Veterinary Department |
| Western Bhar Elghazal State, River Jur County                                                 | Goats            | 13/09/2012 | NA          | 6000  | 200 | 28 | NA  | No                | NA      | Veterinary Department |
| Eastern Equatoria State, Torit, Iktos Budi, Kapeata North, South and East, and Magwi counties | Goats            | 20/09/2012 | NA          | 20000 | 800 | 30 | NA  | No                | NA      | Veterinary Department |
| Upper Nile State, Renk County                                                                 | Goats            | 20/10/2012 | NA          | NA    | NA  | NA | NA  | No                | NA      | Veterinary Department |
| Northern Bhar Elghazal State, Awaile East County                                              | Goats            | 21/10/2012 | NA          | NA    | NA  | NA | NA  | No                | NA      | Veterinary Department |
| Lakes State, Rumbek Centre County                                                             | Goats            | 15/11/2012 | NA          | NA    | NA  | NA | NA  | No                | NA      | Veterinary Department |
| NA                                                                                            | NA               | 2012       | 31          | NA    | NA  | NA | NA  | NA                | NA      | [15]                  |
| NA                                                                                            | Eland, elephant, | 2013       | Sero-survey |       |     |    |     | cELISA            |         | This study            |

|                                                                                                             | tiang, white-eared kob |                        |            |         |        |       |       |                   |         |            |
|-------------------------------------------------------------------------------------------------------------|------------------------|------------------------|------------|---------|--------|-------|-------|-------------------|---------|------------|
| NA                                                                                                          | NA                     | 2013                   | 1          | 23000   | 86     | 36    | 0     | NA                | NA      | [16]       |
| NA                                                                                                          | NA                     | 2014                   | 23         | 3746    | 153    | 95    | 0     | NA                | NA      | [45]       |
| D.R. of the CONGO                                                                                           |                        |                        |            |         |        |       |       |                   |         |            |
| State or region, district or province, (city)                                                               | Species                | Date                   | Outbreaks* | S       | C      | D     | S/D   | Lab. confirmation | Lineage | Reference  |
| NA                                                                                                          | NA                     | 2004                   | 3          | NA      | NA     | NA    | NA    | NA                | NA      | [46]       |
| NA                                                                                                          | NA                     | 2005                   | 3          | NA      | 77     | 36    | NA    | NA                | NA      | [47]       |
| Western Region, Plateaux Department, Lékana District (Lékana) Djambala District (Djambala, Kahon, and Akou) | Sheep, goats           | 30/12/2005, 12/04/2006 | 4          | 719     | 614    | 614   | 93    | cELISA            | NA      | [48]       |
| NA                                                                                                          | NA                     | 2008                   | 1          | NA      | 108    | 90    | 17    | NA                | NA      | [12]       |
| NA                                                                                                          | NA                     | 2010                   | 1          | NA      | 66     | NA    | NA    | NA                | NA      | [49]       |
| NA                                                                                                          | NA                     | 2011                   | 70         | NA      | 62635  | 49121 | 16238 | NA                | NA      | [17]       |
| NA                                                                                                          | NA                     | 2012                   | 89         | NA      | 102688 | 86449 | 12292 | NA                | NA      | [15] †     |
| Western Region, Kwilu Province                                                                              | Sheep, goats           | 23/01/2012, 23/06/2014 | NA         | NA      | NA     | 16250 | NA    | RT-PCR            | NA      | [50] †     |
| NA                                                                                                          | NA                     | 2013                   | 84         | 3732743 | 59742  | 53872 | 815   | NA                | NA      | [16] †     |
| NA                                                                                                          | NA                     | 2014                   | 67         | 155187  | 6298   | 5812  | 48    | NA                | NA      | [45] †     |
| Eastern Region, North Kivu Province (Goma)                                                                  | Sheep                  | 2016                   | NA         | NA      | NA     | NA    | NA    | RT-PCR            | 2       | [51]       |
| Eastern Region, North Kivu Province (Kibumba)                                                               | Sheep, goats           | 2017                   | NA         | NA      | NA     | NA    | NA    | RT-PCR            | 3       | This study |
| Western Region, Kinshasa province (N'sele)                                                                  | Goats                  | 2018                   | NA         | NA      | NA     | NA    | NA    | RT-PCR            | 3       | [51]       |
| Eastern Region, South Kivu province (Kalehe)                                                                | Goats                  | 2018                   | NA         | NA      | NA     | NA    | NA    | RT-PCR            | 3       | [51]       |

\*It is unclear the definition of PPR outbreak in the different reports and publications, the numbers are showed as indicated in each reference.

# Northern Region: Napak, Amudat, Kaabong, Moroto, Nakapiripirit, Abim, Kotido, Alebtong, Lira, Pader, Kitgum, Lamwo, Maracha, Moyo, Koboko, Arua, Yumbe, Agago, Otuke Districts. Eastern Region: Bulambuli, Bukedea, Bukwa, Kapchorwa, Kween, Sironko, Mbale, Bugiri, Busia, Jinja Districts; Western Region: Kyegegwa, Kabarole, Isingiro, Rukungiri, Mbarara, Ntungamo Districts; Central Region: Mubende District

†Data for this year reported by AU-IBAR differ from the data at OIE-WAHIS database, both records are included separately.

**Table S2.** Retrospective information on Peste des petits ruminant antibody detection in wild artiodactyls from natural protected areas in Uganda, tested by cELISA and confirmed with cross neutralization assays (virus neutralization test for Rinderpest virus and Peste des petits ruminant virus deemed positive if  $\geq 2$  times titre of contrary assay) under the Pan African Programme for the Control of Epizootics (PACE).

| Species       | Scientific name              | Year | Location                      | Pos./Sampled | Prev. (CI 95%)   | Reference           |
|---------------|------------------------------|------|-------------------------------|--------------|------------------|---------------------|
| Buffalo       | <i>Syncerus caffer</i>       | 1999 | Kidepo Valley National Park   | 0/11         | 0.0 (0.0–25.9)   | [6,52]              |
| Buffalo       | <i>Syncerus caffer</i>       | 1999 | Lake Mburo National Park      | 0/11         | 0.0 (0.0–25.9)   | [6,52]              |
| Impala        | <i>Aepyceros melampus</i>    | 1999 | Lake Mburo National Park      | 0/32         | 0.0 (0.0–10.7)   | [6,52]              |
| Buffalo       | <i>Syncerus caffer</i>       | 2000 | Semuliki National Park        | 0/10         | 0.0 (0.0–27.7)   | [6,52]              |
| Buffalo       | <i>Syncerus caffer</i>       | 2000 | Murchison Falls National Park | 0/17         | 0.0 (0.0–18.4)   | [6,52]              |
| Buffalo       | <i>Syncerus caffer</i>       | 2000 | Kibale National Park          | 0/5          | 0.0 (0.0–43.4)   | [6,52]              |
| Buffalo       | <i>Syncerus caffer</i>       | 2000 | Pian Upe Wildlife Reserve     | 0/6          | 0.0 (0.0–39.0)   | [6,52]              |
| Roan antelope | <i>Hippotragus equinus</i>   | 2000 | Pian Upe Wildlife Reserve     | 0/1          | 0.0 (0.0–94.9)   | [6,52]              |
| Hartebeest    | <i>Alcelaphus buselaphus</i> | 2000 | Pian Upe Wildlife Reserve     | 0/2          | 0.0 (0.0–65.8)   | [6,52]              |
| Buffalo       | <i>Syncerus caffer</i>       | 2002 | Murchison Falls National Park | 0/8          | 0.0 (0.0–32.4)   | [6,52]              |
| Buffalo       | <i>Syncerus caffer</i>       | 2002 | Kidepo Valley National Park   | 0/17         | 0.0 (0.0–18.4)   | [6,52]              |
| Buffalo       | <i>Syncerus caffer</i>       | 2004 | Kidepo Valley National Park   | 2/24         | 8.3 (2.3–25.8)   | Unpublished results |
| Buffalo       | <i>Syncerus caffer</i>       | 2004 | Murchison Falls National Park | 6/21         | 28.6 (13.8–50.0) | Unpublished results |
| Buffalo       | <i>Syncerus caffer</i>       | 2005 | Queen Elizabeth National Park | 8/32         | 25.0 (13.2–42.1) | Unpublished results |

Pos.=positive; Prev.=prevalence

**Table S3.** Drugs used for wildlife captures in Uganda (buffalo and Uganda kob) and South Sudan (tiang, white eared kob, eland and elephant).

| Species                                   |          | Drug                        | Dose mg                   | Company                                          |
|-------------------------------------------|----------|-----------------------------|---------------------------|--------------------------------------------------|
| <i>Buffalo Syncerus caffer</i>            |          |                             |                           |                                                  |
|                                           | Sedation | Etorphine hydrochloride     | 5–10                      | Novartis Ltd, South Africa                       |
|                                           | Reversal | Xylazine                    | 30–90                     | Kyron Labs (Pty) Ltd, South Africa               |
|                                           |          | Diprenorphine hydrochloride | 16–25                     | Kyron Labs (Pty) Ltd, South Africa               |
|                                           |          | Yohimbine hydrochloride     | 13–26                     | Kyron Labs (Pty) Ltd, South Africa               |
| <i>Uganda Kob Kobus kob thomasi</i>       |          |                             |                           |                                                  |
|                                           | Sedation | azaperone                   | 40–70                     | Kyron Labs (Pty) Ltd, South Africa               |
|                                           |          | Haloperidol                 | 15                        | Kyron Labs (Pty) Ltd, South Africa               |
|                                           | or       |                             |                           |                                                  |
|                                           |          | Etorphine hydrochloride     | 5                         | Novartis Ltd, South Africa                       |
|                                           |          | Xylazine                    | 10                        | Kyron Labs (Pty) Ltd, South Africa               |
| <i>Tiang Damaliscus lunatus tiang</i>     |          |                             |                           |                                                  |
| <i>White-eared kob Kobus kob leucotis</i> |          |                             |                           |                                                  |
|                                           | Sedation | Thiafentanil oxalate        | 5 males<br>3–4 females    | Wildlife Pharmaceuticals (Pty) Ltd, South Africa |
|                                           |          | Azaperone                   | 60–80 males<br>50 females | Kyron Labs (Pty) Ltd, South Africa               |
|                                           | or       |                             |                           |                                                  |
|                                           |          | Etorphine hydrochloride     | 4–8 males<br>3–6 females  |                                                  |
|                                           |          | Medetomidine                | 5 males<br>3–4 females    | Pfizer Laboratories (Pty) Ltd, South Africa      |
|                                           | Reversal | Naltrexone hydrochloride    | 50–150                    | Wildlife Pharmaceuticals (Pty) Ltd, South Africa |
|                                           |          | Atipamezole                 | 5x medetomidine dose      | Zoetis (Pty) Ltd, South Africa                   |

| Eland <i>Taurotragus oryx</i>      |                          |                      |  |                                                  |
|------------------------------------|--------------------------|----------------------|--|--------------------------------------------------|
| Sedation                           | thiafentanil oxalate     | 15–20                |  | Wildlife Pharmaceuticals (Pty) Ltd, South Africa |
|                                    | Azaperone                | 150–200              |  | Kyron Labs (Pty) Ltd, South Africa               |
|                                    | or                       |                      |  |                                                  |
| Reversal                           | Etorphine hydrochloride  | 10–14                |  | Novartis Ltd, South Africa                       |
|                                    | Medetomidine             | 15–20                |  | Pfizer Laboratories (Pty) Ltd, South Africa      |
|                                    | Naltrexone hydrochloride | 100–140              |  | Wildlife Pharmaceuticals (Pty) Ltd, South Africa |
|                                    | Atipamezole              | 5x medetomidine dose |  | Zoetis (Pty) Ltd, South Africa                   |
| Elephant <i>Loxodonta africana</i> |                          |                      |  |                                                  |
| Sedation                           | Thiafentanil oxalate     | 12–15                |  | Wildlife Pharmaceuticals (Pty) Ltd, South Africa |
|                                    | Azaperone                | 40–60                |  | Kyron Labs (Pty) Ltd, South Africa               |
|                                    | or                       |                      |  |                                                  |
|                                    | Etorphine hydrochloride  | 10–20                |  | Novartis Ltd, South Africa                       |
|                                    | Azaperone                | 40–60                |  | Kyron Labs (Pty) Ltd, South Africa               |

---

**Table S4.** Number of herd owners sampled in western Uganda. When herd owners were not recorded is indicated with NA. The mean number of animals per herd and minimum (min.) and maximum (max.) sizes are indicated by district and species.

| District                 | Subcounty      | Cattle |               |      | Goats |            |      | Sheep |            |      |
|--------------------------|----------------|--------|---------------|------|-------|------------|------|-------|------------|------|
|                          |                | 2015   | 2016          | 2017 | 2015  | 2016       | 2017 | 2015  | 2016       | 2017 |
| <b>Buliisa district</b>  |                | 0      | 0             | 0    | NA    | 0          | 0    | NA    | 0          | 0    |
|                          | Buliisa        | 0      | 0             | 0    | NA    | 0          | 0    | NA    | 0          | 0    |
|                          | Butaba         | 0      | 0             | 0    | NA    | 0          | 0    | 0     | 0          | 0    |
| Herd mean (min.-max.)    |                |        | NA            |      |       | NA         |      |       | NA         |      |
| <b>Kasese district</b>   |                | 22     | NA            | 14   | NA    | NA         | 86   | 0     | NA         | 17   |
|                          | Karusandara    | 3      | NA            | 0    | 1     | 0          | 0    | 0     | 0          | 0    |
|                          | Katwe-Kabatoro | 4      | 0             | 4    | NA    | 0          | 0    | 0     | 0          | 0    |
|                          | Kisinga        | 0      | 0             | 0    | 0     | 0          | 59   | 0     | 0          | 11   |
|                          | Kitswamba      | 0      | NA            | 0    | 0     | NA         | 0    | 0     | 0          | 0    |
|                          | Lake Katwe     | 6      | NA            | 9    | NA    | NA         | 0    | 0     | 0          | 0    |
|                          | Muhokya        | 4      | NA            | 0    | 0     | NA         | 0    | 0     | NA         | 0    |
|                          | Mukunyu        | 0      | 0             | 0    | 0     | 0          | 27   | 0     | 0          | 6    |
|                          | Nyakatonzi     | 5      | 0             | 1    | 0     | 0          | 0    | 0     | 0          | 0    |
| Herd mean (min.-max.)    |                |        | 79.0 (15–309) |      |       | 3.4 (1–25) |      |       | 1.8 (1–3)  |      |
| <b>Kisoro district</b>   |                | 38     | NA            | 86   | NA    | NA         | 92   | 0     | NA         | 61   |
|                          | Muramba        | 34     | NA            | 43   | NA    | NA         | 30   | NA    | NA         | 34   |
|                          | Nyarusiza      | 4      | NA            | 43   | NA    | NA         | 62   | NA    | NA         | 27   |
| Herd mean (min.-max.)    |                |        | 4.3 (1–17)    |      |       | 4.4 (1–16) |      |       | 4.2 (1–11) |      |
| <b>Rubirizi district</b> |                | 1      | NA            | 0    | NA    | NA         | 0    | NA    | NA         | 0    |
|                          | Katanda        | 0      | 0             | 0    | NA    | 0          | 0    | 0     | 0          | 0    |
|                          | Kicwamba       | 0      | NA            | 0    | 1     | NA         | 0    | 1     | 0          | 0    |
|                          | Kirugu         | 0      | 0             | 0    | NA    | 0          | 0    | NA    | 0          | 0    |
|                          | Ryeru          | 1      | NA            | 0    | 0     | NA         | 0    | 0     | NA         | 0    |
| Herd mean (min.-max.)    |                |        | 31.0 (2–60)   |      |       | NA         |      |       | NA         |      |
| <b>Total</b>             |                | 61     | NA            | 100  | NA    | NA         | 178  | NA    | NA         | 78   |

## Supplementary material references

1. El Hag Ali, B.; Taylor, W. Isolation of peste des petits ruminants virus from the Sudan. *Res. Vet. Sci.* **1984**, *36*, 1–4.
2. Roeder, P.L.; Abraham, G.; Kenfe, G.; Barretf, T. Peste des Petits Ruminants in Ethiopian Goats. *Trop. Anim. Health Prod.* **1994**, *26*, 69–73.
3. Wamwayi, H.M.; Rossiter, P.B.; Kariuki, D.P.; Wafula, J.S.; Barrett, T.; Anderson, J. Peste des petits ruminants antibodies in East Africa. *Vet. Rec.* **1995**, *136*, 199–200.
4. Banyard, A.C.; Parida, S.; Batten, C.; Oura, C.; Kwiatek, O.; Libeau, G. Global distribution of peste des petits ruminants virus and prospects for improved diagnosis and control. *J. Gen. Virol.* **2010**, *91*, 2885–2897.
5. Khalafalla, A.I.; Saeed, I.K.; Ali, Y.H.; Abdurrahman, M.B.; Kwiatek, O.; Libeau, G.; Obeida, A.A.; Abbas, Z. An outbreak of peste des petits ruminants (PPR) in camels in the Sudan. *Acta Trop.* **2010**, *116*, 161–165.
6. Kock, R.A.; Wamwayi, H.M.; Rossiter, P.B.; Libeau, G.; Wambwa, E.; Okori, J.; Shiferaw, F.S.; Mlengeya, T.D. Re-infection of wildlife populations with rinderpest virus on the periphery of the Somali ecosystem in East Africa. *Prev. Vet. Med.* **2006**, *75*, 63–80.
7. Roeder, P.; Mariner, J.; Kock, R. Rinderpest: The veterinary perspective on eradication. *Philos. Trans. R. Soc. B Biol. Sci.* **2013**, *368*.
8. AU-IBAR *Pan African Animal Health Yearbook 2003*; Interafrican Bureau for Animal Resources and African Union: Nairobi Kenya, 2004; pp. 1–73.
9. Karimuribo, E.D.; Loomu, P.M.; Mellau, L.S.B.; Swai, E.S. Retrospective study on sero-epidemiology of peste des petits ruminants before its official confirmation in northern Tanzania in 2008. *Res. Opin. Anim. Vet. Sci.* **2011**, *1*, 184–187.
10. Luka, P.D.; Erume, J.; Mwiine, F.N.; Ayebazibwe, C. Molecular characterization of peste des petits ruminants virus from the Karamoja region of Uganda ( 2007-2008 ). *Arch. Virol.* **2012**, *157*, 29–35.
11. AU-IBAR *Pan African Animal Health Yearbook 2007*; Interafrican Bureau for Animal Resources and African Union: Nairobi, Kenya, 2008; pp. 1–69.
12. AU-IBAR *Pan African Animal Health Yearbook 2008*; Interafrican Bureau for Animal Resources and African Union: Nairobi, Kenya, 2009; pp. 1–81.
13. Ministry of Agriculture Animal Industry and Fisheries MAAIF *Vaccines for the control of neglected animal diseases in Africa (Vacnada). Cumulative Progress Report for December, 2011*; MAAIF: Kampala, Uganda. pp. 1–30.
14. Muniraju, M.; Munir, M.; Parthiban, A.R.; Banyard, A.C.; Bao, J.; Wang, Z.; Ayebazibwe, C.; Ayelet, G.; Harrak, M. El; Mahapatra, M.; et al. Molecular Evolution of Peste des Petits Ruminants Virus. *Emerg. Infect. Dis.* **2014**, *20*, 2023–2033.
15. AU-IBAR *Pan African Animal Health Yearbook 2012*; Interafrican Bureau for Animal Resources and African Union: Nairobi, Kenya, 2013; pp. 1–74.
16. AU-IBAR *Pan African Animal Resources Yearbook 2013*; Interafrican Bureau for Animal Resources and African Union: Nairobi, Kenya, 2014; pp. 1–107.
17. AU-IBAR *Pan African Animal Health Yearbook 2011*; Interafrican Bureau for Animal Resources and African Union: Nairobi, Kenya, 2012; pp. 1–92.
18. Nakayima, J.; Nanfuka, M.; Kidega, E.; Kajuna, Y.; Ndumu, D. Epidemiological Insights into the Occurrence of Peste des Petits Ruminants Virus (PPRV) Among Sheep, Goats and Cattle in Western Uganda. *Int. J. Livest. Res.* **2018**, *8*, 73.
19. Sande, R.; Ayebazibwe, C.; Waiswa, C.; Ejobi, F.; Mwiine, F.N.; Olaho-Mukani, W. Evidence of Peste Des Petits Ruminants Virus Antibodies in Small Ruminants in Amuru and Gulu Districts, Uganda. *Pak. Vet. J.* **2011**, *31*, 363–365.

20. Waret-szkuta, A.; Roger, F.; Chavernac, D.; Yigezu, L.; Libeau, G.; Pfeiffer, D.U.; Guitián, J. Peste des Petits Ruminants (PPR) in Ethiopia: Analysis of a national serological survey. *BMC Vet. Res.* **2008**, *4*, 1–10.
21. Torsson, E.; Kgotlele, T.; Berg, M.; Mtui-Malamsha, N.; Swai, E.S.; Wensman, J.J.; Misinzo, G. History and current status of peste des petits ruminants virus in Tanzania. *Infect. Ecol. Epidemiol.* **2016**, *6*, 1–7.
22. Nkamwesiga, J.; Coffin-Schmitt, J.; Ochwo, S.; Mwiine, F.N.; Palopoli, A.; Ndekezi, C.; Isingoma, E.; Nantima, N.; Nsamba, P.; Adiba, R.; et al. Identification of peste des petits ruminants transmission hotspots in the Karamoja subregion of Uganda for targeting of eradication interventions. *Front. Vet. Sci.* **2019**, *6*, 1–13.
23. Dundon, W.G.; Kihu, S.M.; Gitao, G.C.; Bebola, L.C.; John, N.M.; Oyugi, J.O.; Loitsch, A.; Diallo, A. Detection and Genome Analysis of a Lineage III Peste Des Petits Ruminants Virus in Kenya in 2011. *Transbound. Emerg. Dis.* **2015**, *64*, 644–650.
24. Kihu, S.M.; Gachohi, J.M.; Ndungu, E.K.; Gitao, G.C.; Bebola, L.C.; John, N.M.; Wairire, G.G.; Maingi, N.; Wahome, R.G.; Ireri, R. Sero-epidemiology of Peste des petits ruminants virus infection in Turkana County, Kenya. *BMC Vet. Res.* **2015**, *11*, 1–13.
25. Olupot, W.; Mcneilage, A.J.; Plumptre, A.J. *An analysis of socioeconomics of bushmeat hunting at major hunting sites in Uganda*; 2009;
26. Plumptre, A.J.; Nangendo, G.; Ayebare, S.; Kirunda, B.; Mugabe, H.; Nsubuga, P. & Nampindo, S. Impacts of climate Change and Industrial Development on the long-term changes in Wildlife Behavior in the Greater Virunga Landscape. *Wildl. Conserv. Soc.* **2017**.
27. Floody, O.R.; Arnold, A.P. Uganda Kob (*Adenota kob thomasi*): territoriality and the spatial distributions of sexual and agonistic behaviours at a territorial group. *Z. Tierpsychol.* **1975**, *37*, 192–212.
28. Plumptre, A.J.; Kujirakwinja, D.; Moyer, D.; Driciru, M.; Rwetsiba, A. *Greater Virunga Landscape, Large mammal survey 2010*; Uganda Wildlife Authority (UWA): Kampala, Uganda, 2010; pp 1–15.
29. Woodford, M.H. Tuberculosis in wildlife in the Ruwenzori National Park, Uganda (Part I). *Trop. Anim. Health Prod.* **1982**, *14*, 81–88.
30. UBOS *The National Population and Housing Census 2014 – Main Report*; Kampala, Uganda, 2016;
31. MAAIF and UBOS *The national livestock census. A summary report of the national livestock census 2008.* *Uganda Bur. Stat.* **2009**, *May*, 1–34.
32. Meunier, N. V.; Sebulime, P.; White, R.G.; Kock, R. Wildlife-livestock interactions and risk areas for cross-species spread of bovine tuberculosis. *Onderstepoort J. Vet. Res.* **2017**, *84*, 1–10.
33. Fay, M.; Elkan, P.; Marjan, M.; Grossmann, F. *Aerial Surveys of Wildlife, Livestock, and Human Activity in and around Existing and Proposed Protected Areas of Southern Sudan, Dry Season 2007. Phase I.*; Juba, 2007;
34. GOSS; SSCCSE *Southern Sudan Counts: Tables from the 5th Sudan Population and Housing Census, 2008*; 2010;
35. National Bureau of Statistics *Population projections for South Sudan by County 2015-2020*; 2015;
36. Plumptre, A.J.; Davenport, T.R.B.; Behangana, M.; Kityo, R.; Eilu, G.; Ssegawa, P.; Ewango, C.; Meirte, D.; Kahindo, C.; Herremans, M.; et al. The biodiversity of the Albertine Rift. *Biol. Conserv.* **2007**, *134*, 178–194.
37. CTA/Université Evangélique en Afrique *Building the Evidence Base on the Agricultural Nutrition Nexus: Democratic Republic of Congo*; Agriculture and nutrition; 2015;
38. Büscher, K.; Mathys, G. War, Displacement and Rural–Urban Transformation: Kivu’s Boomtowns, Eastern D.R. Congo. *Eur. J. Dev. Res.* **2019**, *31*, 53–71.
39. AU-IBAR *Pan African Animal Health Yearbook 2006*; Interafrican Bureau for Animal Resources and African Union: Nairobi, Kenya, 2007; pp. 1–85.



40. AU-IBAR *Pan African Animal Health Yearbook 2007*; Interafrican Bureau for Animal Resources and African Union: Nairobi, Kenya, 2008; pp. 1–69.
41. OIE-WAHIS. The World Animal Health Information System, Peste des petits Ruminants, Uganda. Available online:  
[https://www.oie.int/wahis\\_2/public/wahid.php/Reviewreport/Review?page\\_refer=MapFullEventReport&reportid=5837](https://www.oie.int/wahis_2/public/wahid.php/Reviewreport/Review?page_refer=MapFullEventReport&reportid=5837).
42. Ruhweza, S.P.; Ayebazibwe, C.; Mwiine, F.N.; Muhanguzi, D.; Mulindwa, D.; Olaho-Mukani, W. Seroprevalence of Peste des Petits Ruminants (PPR) virus antibodies in goats and sheep in North-Eastern Uganda. *Bull. Anim. Heal. Prod. Africa* **2010**, *141*–146.
43. Mulindwa, B.; Ruhweza, S.P.; Ayebazibwe, C.; Mwiine, F.N.; Muhanguzi, D.; Olaho-mukani, W. Peste des Petits Ruminants serological survey in Karamoja sub region of Uganda by competitive ELISA. *Vet. World* **2011**, *4*, 149–152.
44. Lernfelt, L. Prevalence of antibodies for Peste des petits des ruminants virus and Brucella and related risk factors in goat herds in urban and peri-urban agriculture in Kampala, Uganda, Second cycle thesis, A2E. Sveriges lantbruksuniversitet (SLU), Uppsala, Sweden, 2013.
45. AU-IBAR *Pan African Animal Health Yearbook 2014*; Interafrican Bureau for Animal Resources and African Union: Nairobi, Kenya, 2015; pp. 1–148.
46. AU-IBAR *Pan African Animal Health Yearbook 2004*; Interafrican Bureau for Animal Resources and African Union: Nairobi, Kenya, 2005; pp. 1–73.
47. AU-IBAR *Pan African Animal Health Yearbook 2005*; Interafrican Bureau for Animal Resources and African Union: Nairobi, Kenya, 2006; pp. 1–85.
48. OIE-WAHIS. The World Animal Health Information System, Peste des petits ruminants, Congo (Rep. of the). Available online:  
[https://www.oie.int/wahis\\_2/public/wahid.php/Reviewreport/Review?page\\_refer=MapFullEventReport&reportid=5412](https://www.oie.int/wahis_2/public/wahid.php/Reviewreport/Review?page_refer=MapFullEventReport&reportid=5412).
49. AU-IBAR *Pan African Animal Health Yearbook 2010*; Interafrican Bureau for Animal Resources and African Union: Nairobi, Kenya, 2011; pp. 1–104.
50. OIE-WAHIS. The World Animal Health Information System, Peste des petits ruminants, Congo (Rep. of the). Available online:  
[https://www.oie.int/wahis\\_2/public/wahid.php/Reviewreport/Review?reportid=11810](https://www.oie.int/wahis_2/public/wahid.php/Reviewreport/Review?reportid=11810).
51. Tshilenge, M.G.; Walandila, J.S.; Byakya, D.; Masumu, J.; Katshay, L.; Cattoli, G.; Bushu, E.; Mpiana, S.; Dundon, W.G. Peste des petits ruminants viruses of lineages II and III identified in the Democratic Republic of the Congo. *Vet. Microbiol.* **2019**, *239*, 108493.
52. Kock, R.A. The Role of Wildlife in the Epidemiology of Rinderpest in East and Central Africa 1994-2004: A Study Based on Serological Surveillance and Disease Investigation. Thesis for the Degree of Doctor of Veterinary Medicine., University of Cambridge, Cambridge, England, 2008.
